# Supplementary material for: The genomic characterisation and comparison of Bacillus cereus strains isolated from indoor air
Source: PubMed Central journal article supplement (PMC7847026; doi:10.1186/s13099-021-00399-4), 2021-01-30
Supplement: 13099_2021_399_MOESM3_ESM.pdf [file 13099_2021_399_MOESM3_ESM.pdf]

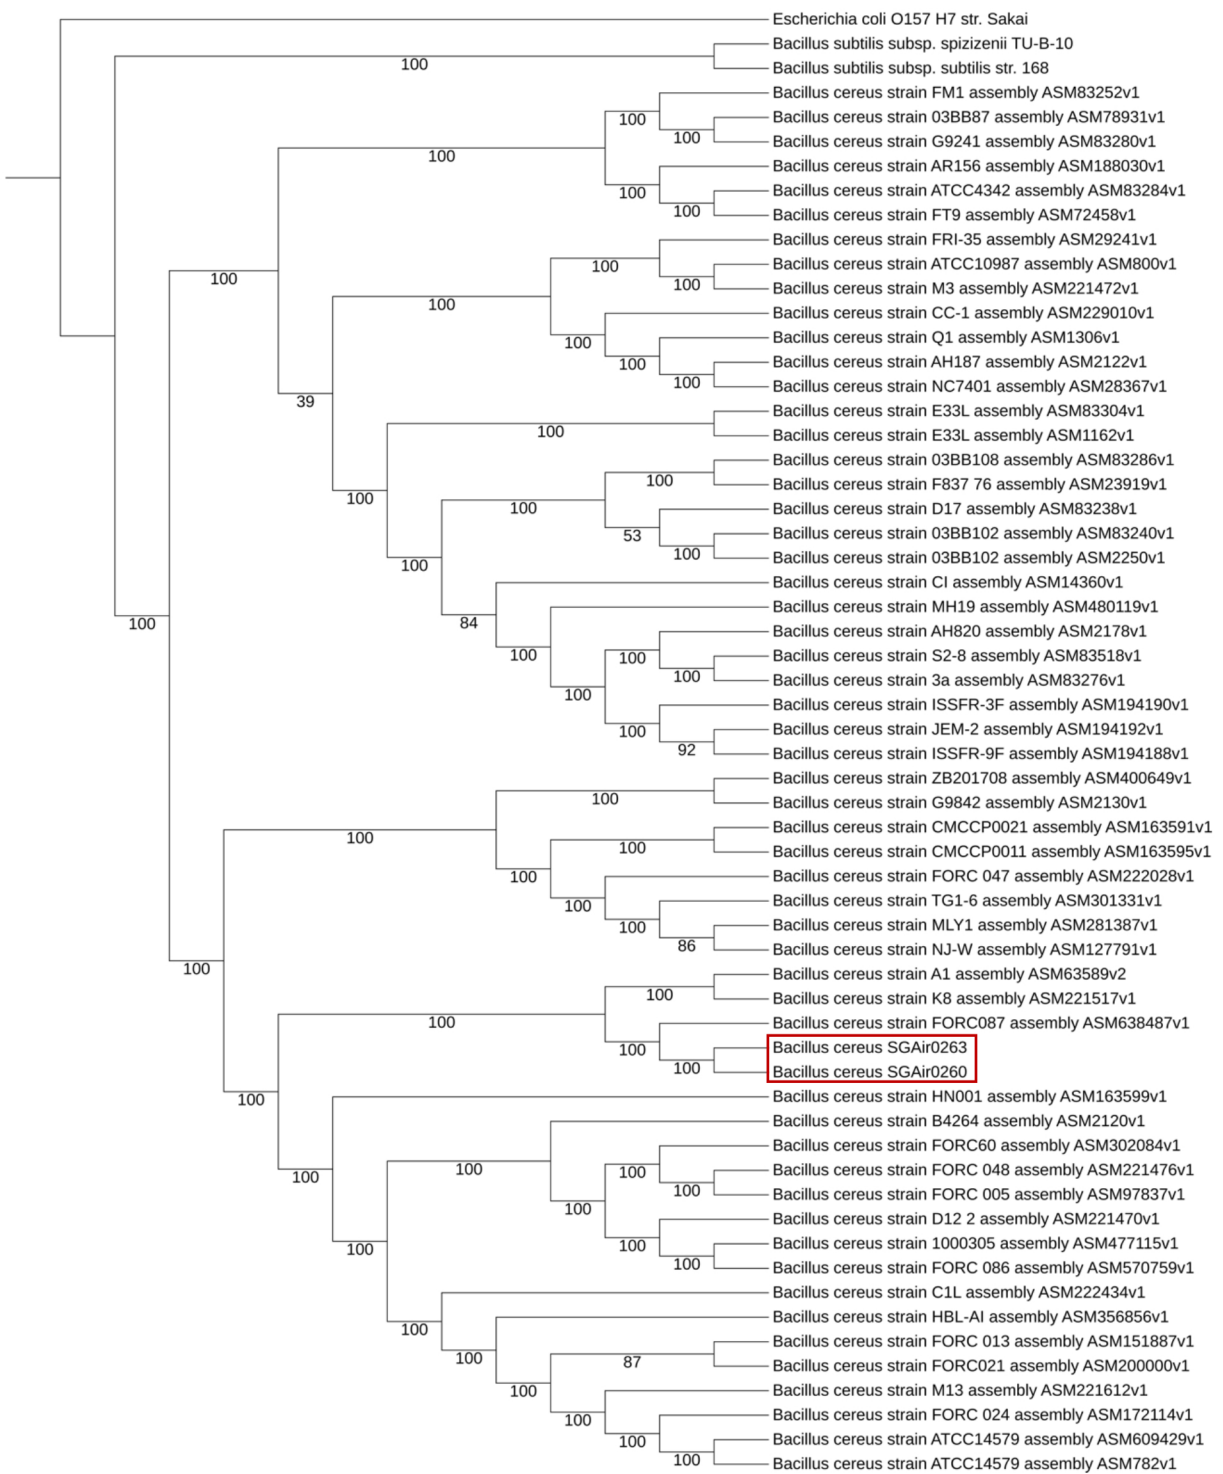

**Additional File 3.** Maximum likelihood tree of SGAir strains, 55 complete genomes of *Bacillus cereus* retrieved from NCBI, with outgroups, *Escherichia coli* 157 H7 str. Sakai, *Bacillus subtilis* subsp. *subtilis* str., and *Bacillus subtilis* subsp. *spizizenii* TU-B-10.
