# Supplementary material for: The genomic characterisation and comparison of Bacillus cereus strains isolated from indoor air
Source: PubMed Central journal article supplement (PMC7847026; doi:10.1186/s13099-021-00399-4), 2021-01-30
Supplement: 13099_2021_399_MOESM6_ESM.pdf [file 13099_2021_399_MOESM6_ESM.pdf]

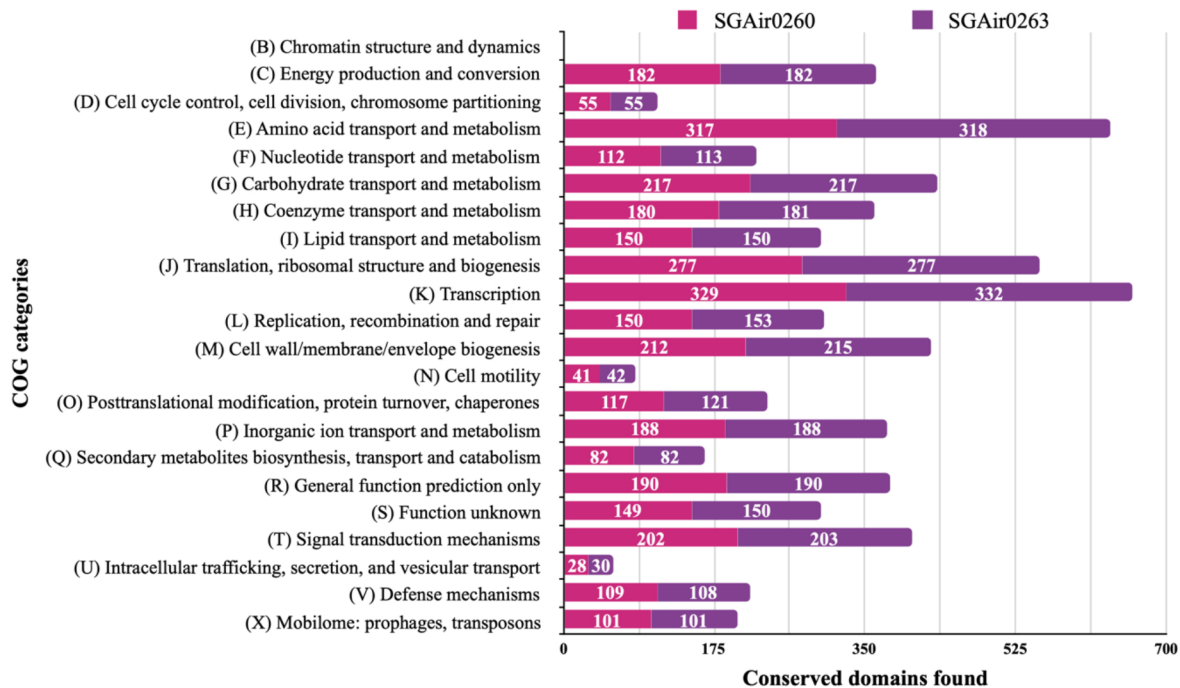

**Additional File 6.** Horizontal bar chart showing COG categories and number of conserved domains found for each category in the genomes of *Bacillus cereus* strains SGAir0260 (total number of genes assigned to COG groups = 3389) and SGAir0263 (3409). The number of identified conserved domains is shown inside each bar.
