# Supplementary material for: The genomic characterisation and comparison of Bacillus cereus strains isolated from indoor air
Source: Gut Pathog. 2021 Jan 30;13:6. doi: 10.1186/s13099-021-00399-4 (PMC7847026; doi:10.1186/s13099-021-00399-4)
Supplement: Supplementary file 10 — Additional file 10. MIC for antibacterial agents in accordance to CLSI Standard Guideline M45A2E & M45-P. MIC experiment results for antibacterial agents in accordance to CLSI Standard Guideline M45A2E & M45-P. [file 13099_2021_399_MOESM10_ESM.xlsx]

## Sheet: Additional File10
MIC for antibacterial agents in accordance to CLSI Standard Guideline M45A2E & M45-P.
The lowest concentration of antibacterial agent with no detectable value of OD600 was recorded as the MIC. Based on the MIC values, isolates were classified as Susceptible (S), Intermediate (I) and Resistant (R) according to the CLSI guidelines.
Antibiotics		MIC Interpretive Criteria (µg/ml)*			MIC value (µg/ml)		Remarks
Class	Agent	Sensitive	Intermediate	Resistant	SGAir0260	SGAir0263
		(S)	(I)	(R)
Penicillin	Ampicillin	≤ 0.25	_	≥ 0.25	128	128	Resistant
Glycopeptides	Vancomycin	≤ 4	_	_	1	2	Susceptible
Tetracyclines	Tetracycline	≤ 4	8	≥ 16	1	2	Susceptible
Quinolones	Ciprofloxacin	≤ 1	2	≥ 4	0.0625	0.125	Susceptible
Phophonics	Fosfomycin	≤ 64	128	≥ 256	256	256	Resistant
* No universally accepted MIC breakpoints have been defined for susceptibility and resistance to fosfomycin by broth dilution methods due to paucity of preclinical and clinical data. MIC for susceptibility ranges from ≤ 32 - 64 µg/mL and MIC for resistance ranges from >32 - >256 µg/mL according to CLSI and the European Committee on Antimicrobial Susceptibility Testing (EUCAST).
